# Supplementary material for: Depletion of Alpha-Melanocyte-Stimulating Hormone Induces Insatiable Appetite and Gains in Energy Reserves and Body Weight in Zebrafish
Source: MDPI journal article supplement (doi:10.3390/biomedicines9080941), 2021-08-02
Supplement: s1 [file s1]

**Supplementary Table S1. Primer sequences used for quantitative RT-PCR**

| Gene           | Accession      | Forward Primer          | Reverse Primer           |
|----------------|----------------|-------------------------|--------------------------|
| <i>bactin1</i> | NM_131031.1    | CGAGCAGGAGATGGGAACC     | CAACGGAAACGCTCATTGC      |
| <i>gh1</i>     | NM_001020492   | TCGTTCTGCAACTCTGACTCC   | CCGATGGTCAGGCTGTTTGA     |
| <i>ghrb</i>    | NM_001111081.1 | GCTGCGCTCTGTTGATAATGT   | GGCGGAGGGAGGTGGAT        |
| <i>igf2b</i>   | NM_001001815   | AACCTGCCAAGTCAGAGAGGG   | GGACCTCCTGTTTTAATGCGG    |
| <i>igfbp1b</i> | NM_001098257.2 | GTCACAACTCAACGCCATCC    | GAACTTCTCTCCCAACGCCT     |
| <i>igfbp5b</i> | NM_001126463.1 | CAGGGGAGTGTGTACGAACG    | AGTCGTGTCTGGCTTCACTG     |
| <i>igfbp6b</i> | NM_001161402.2 | CATCGCTTCTCCTACGGGAC    | GGGGTCTCGAACTCACCATT     |
| <i>pmch</i>    | NM_001202542.1 | TTCATACTTGCGGACACAGG    | TCCATCGTGCTGAATCCATC     |
| <i>agrp2</i>   | NM_001271291.1 | AGTTCAGTCCATCACATGCG    | TTTCTCCTGATTCCACACTCC    |
| <i>npy</i>     | NM_131074.2    | AGCACTAAGACACTACATCAACC | GATGAGATCACCATGCCAAATG   |
| <i>hcrt</i>    | NM_001077392   | TCATGGACTGCACAGCTAAG    | CATCTCGTAGAGTTTGCAGGAG   |
| <i>bdnf</i>    | NM_001308648.1 | AGCATCTGTTGGAGTGTGTG    | CAGCTCTCATGCAACTGAAG     |
| <i>sim1a</i>   | NM_178222.3    | CTGTACATTTCAGAAACGGCG   | AAGTGTGAATGATAGGGCTGG    |
| <i>crhb</i>    | NM_001007379.1 | CCAAGGATTTACCAATTACGCAC | CGATGGCTCTACATTCATACGG   |
| <i>trh</i>     | NM_001012365.2 | GCGCTCCATCCTCACAC       | GCTGTCGCTTCTCCATCC       |
| <i>pcsk2</i>   | NM_001142266   | TCTCGCCTCAAACCTACAACG   | TGGAAACGGCAGACACTTC      |
| <i>ghrl</i>    | NM_001083872.1 | GTGTTTCTCTTTCCTTGTGTCTC | TTCTTTGATCACTGGTATCTCTGG |

**Supplementary Table S2. Primer sequences used for in situ hybridization probes**

| Gene         | Accession      | Forward Primer           | Reverse Primer          |
|--------------|----------------|--------------------------|-------------------------|
| <i>pomca</i> | NM_181438      | ACAGAGGAGAACATCTTGGAATGC | GCCACCTTCGTTTCTATGCATGA |
| <i>bdnf</i>  | NM_001308648.1 | GTCATTGAGGAGTTGCTTGAG    | TATCTGCCCCTCTTA ATGGTC  |
| <i>gh1</i>   | NM_001020492   | ATCCGTGTGCAACACCTTCACCAG | CCATGCCTGCTTGATATTTCTGC |
| <i>sim1a</i> | NM_178222.3    | TGTTGCTGGTAAAAGGACAAG    | CCCATTCTCAGGTGAAGATT    |
